# Supplementary material for: macroH2A2 antagonizes epigenetic programs of stemness in glioblastoma
Source: PubMed Central journal article supplement (PMC10224928; doi:10.1038/s41467-023-38919-2), 2023-05-27
Supplement: 41467_2023_38919_MOESM1_ESM.pdf [file 41467_2023_38919_MOESM1_ESM.pdf]

1 **SUPPLEMENTARY INFORMATION**

2

3 **Supplementary Table 1. Clinical and molecular information for tumour samples used in**  
 4 **this study.**

5

| Specimen | Age (years)    | Sex           | Diagnosis                 | IDH status | ATRX status | Chr 7          | Chr 10                             | Amplifications   |
|----------|----------------|---------------|---------------------------|------------|-------------|----------------|------------------------------------|------------------|
| G523     | Average: 60.7  | Male, n = 5   | glioblastoma, WHO grade 4 | wildtype   | N/A         | Gain of 7p, 7q | equivocal                          | EGFR, CDK4, MDM2 |
| GSC2     | Median: 60.5   | Female, n = 1 | glioblastoma, WHO grade 4 | wildtype   | Retained    | Gain of 7p, 7q | Loss of chr10p, chr10q             | EGFR             |
| GSC3     | Range: 50 - 73 |               | glioblastoma, WHO grade 4 | wildtype   | Retained    | Gain of 7p, 7q | Loss of chr10p, chr10q (subclonal) | none             |
| SM4447   |                |               | glioblastoma, WHO grade 4 | wildtype   | Retained    | N/A            | N/A                                | N/A              |
| SM4691   |                |               | glioblastoma, WHO grade 4 | wildtype   | Retained    | N/A            | N/A                                | N/A              |
| SM4491   |                |               | glioblastoma, WHO grade 4 | wildtype   | Retained    | N/A            | N/A                                | N/A              |

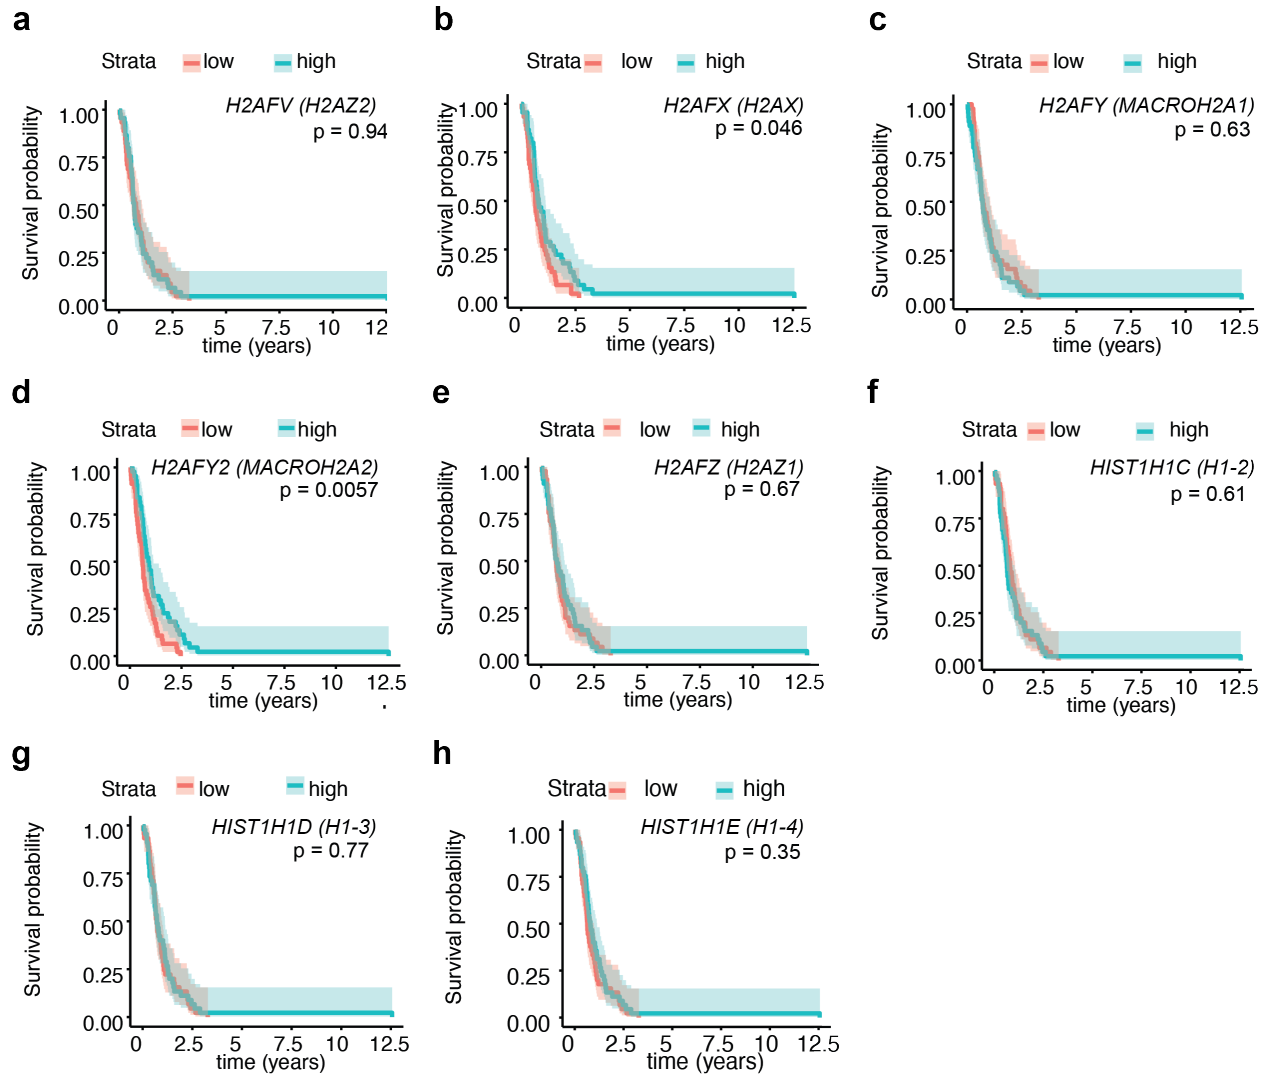

6  
7  
8  
9  
10  
11

**Supplementary Figure S1. (a-h)** Survival analyses of the Gravendeel et al<sup>1</sup> dataset for histone variants **(a)** *H2AFV (H2AZ2)*, **(b)** *H2AFX (H2AX)*, **(c)** *H2AFY (MACROH2A1)*, **(d)** *H2AFY2 (MACROH2A2)*, **(e)** *H2AFZ (H2AZ1)*, **(f)** *HIST1H1C (H1-2)*, **(g)** *HIST1H1D (H1-3)*, **(h)** *HIST1H1E (H1-4)*. P values computed by log-rank test.

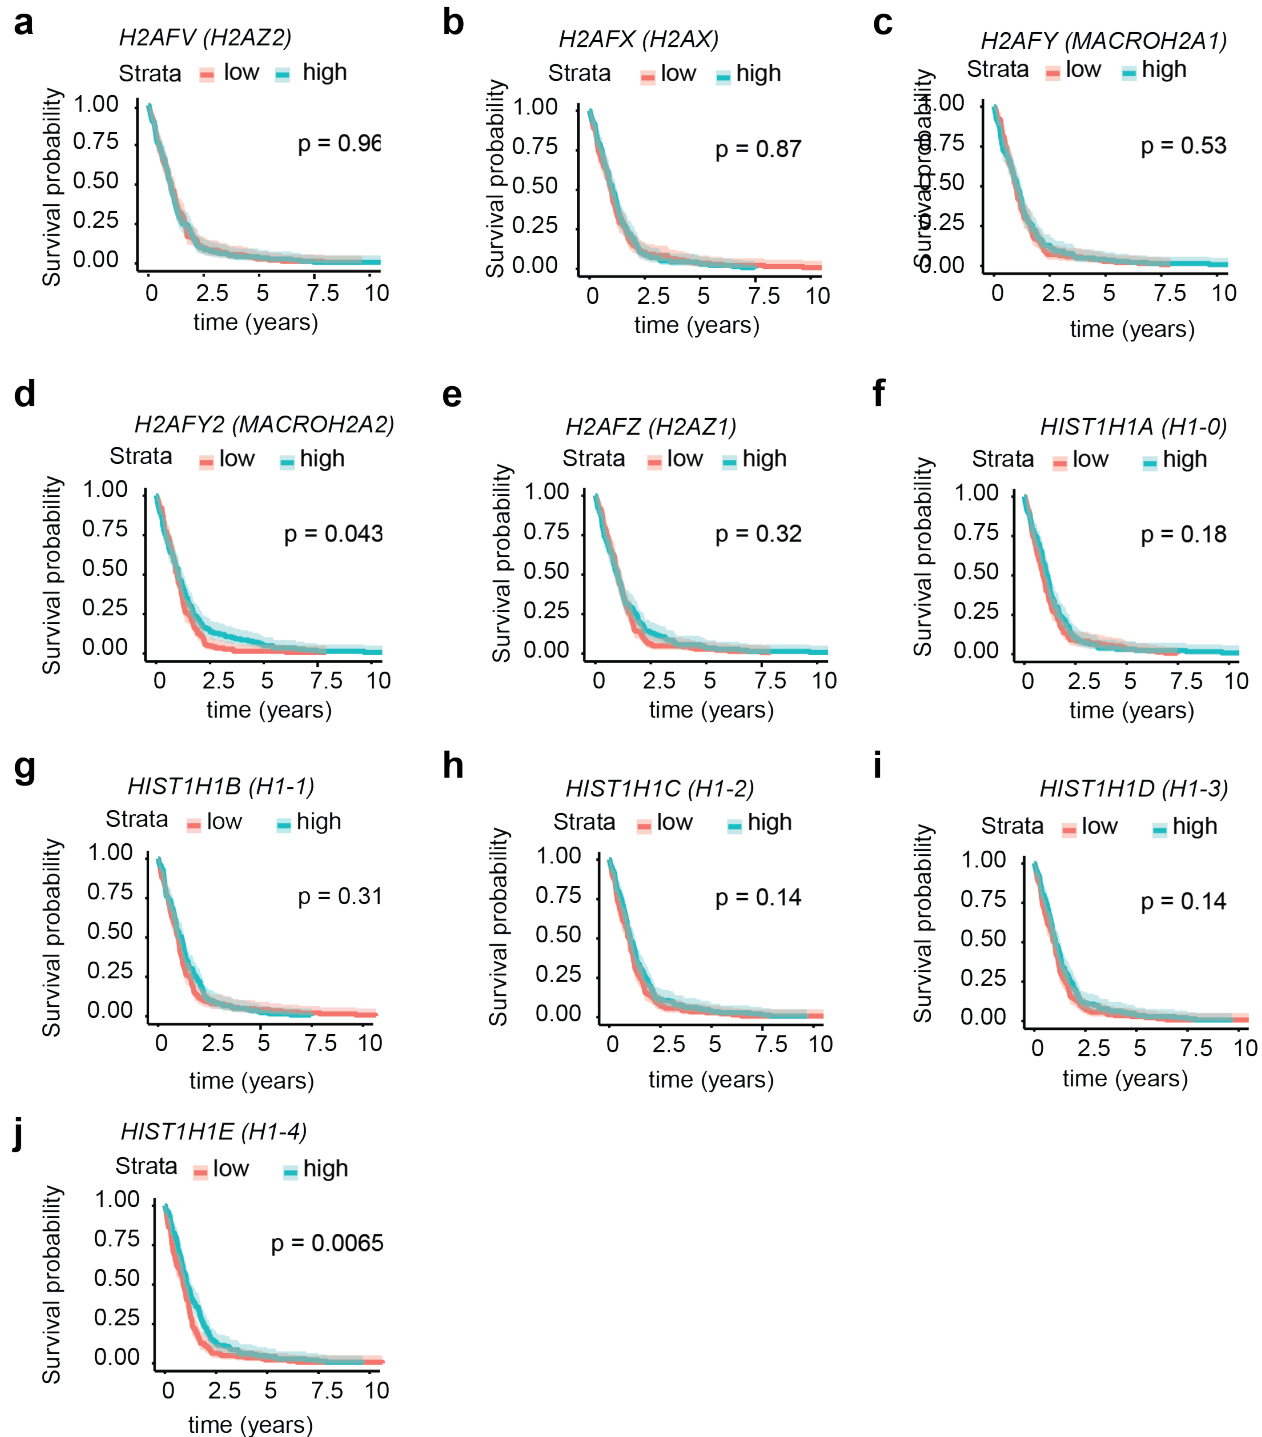

12  
 13 **Supplementary Figure S2. (a-j)** Survival analyses of the TCGA high-grade glioma dataset<sup>2,3</sup> for  
 14 histone variants **(a)** *H2AFV (H2AZ2)*, **(b)** *H2AFX (H2AX)*, **(c)** *H2AFY (MACROH2A1)*, **(d)**  
 15 *H2AFY2 (MACROH2A2)*, **(e)** *H2AFZ (H2AZ1)*, **(f)** *HIST1H1A (H1-0)*, **(g)** *HIST1H1B (H1-1)*,  
 16 **(h)** *HIST1H1C (H1-2)*, **(i)** *HIST1H1D (H1-3)*, **(j)** *HIST1H1E (H1-4)*. P values computed by log-  
 17 rank test.

18

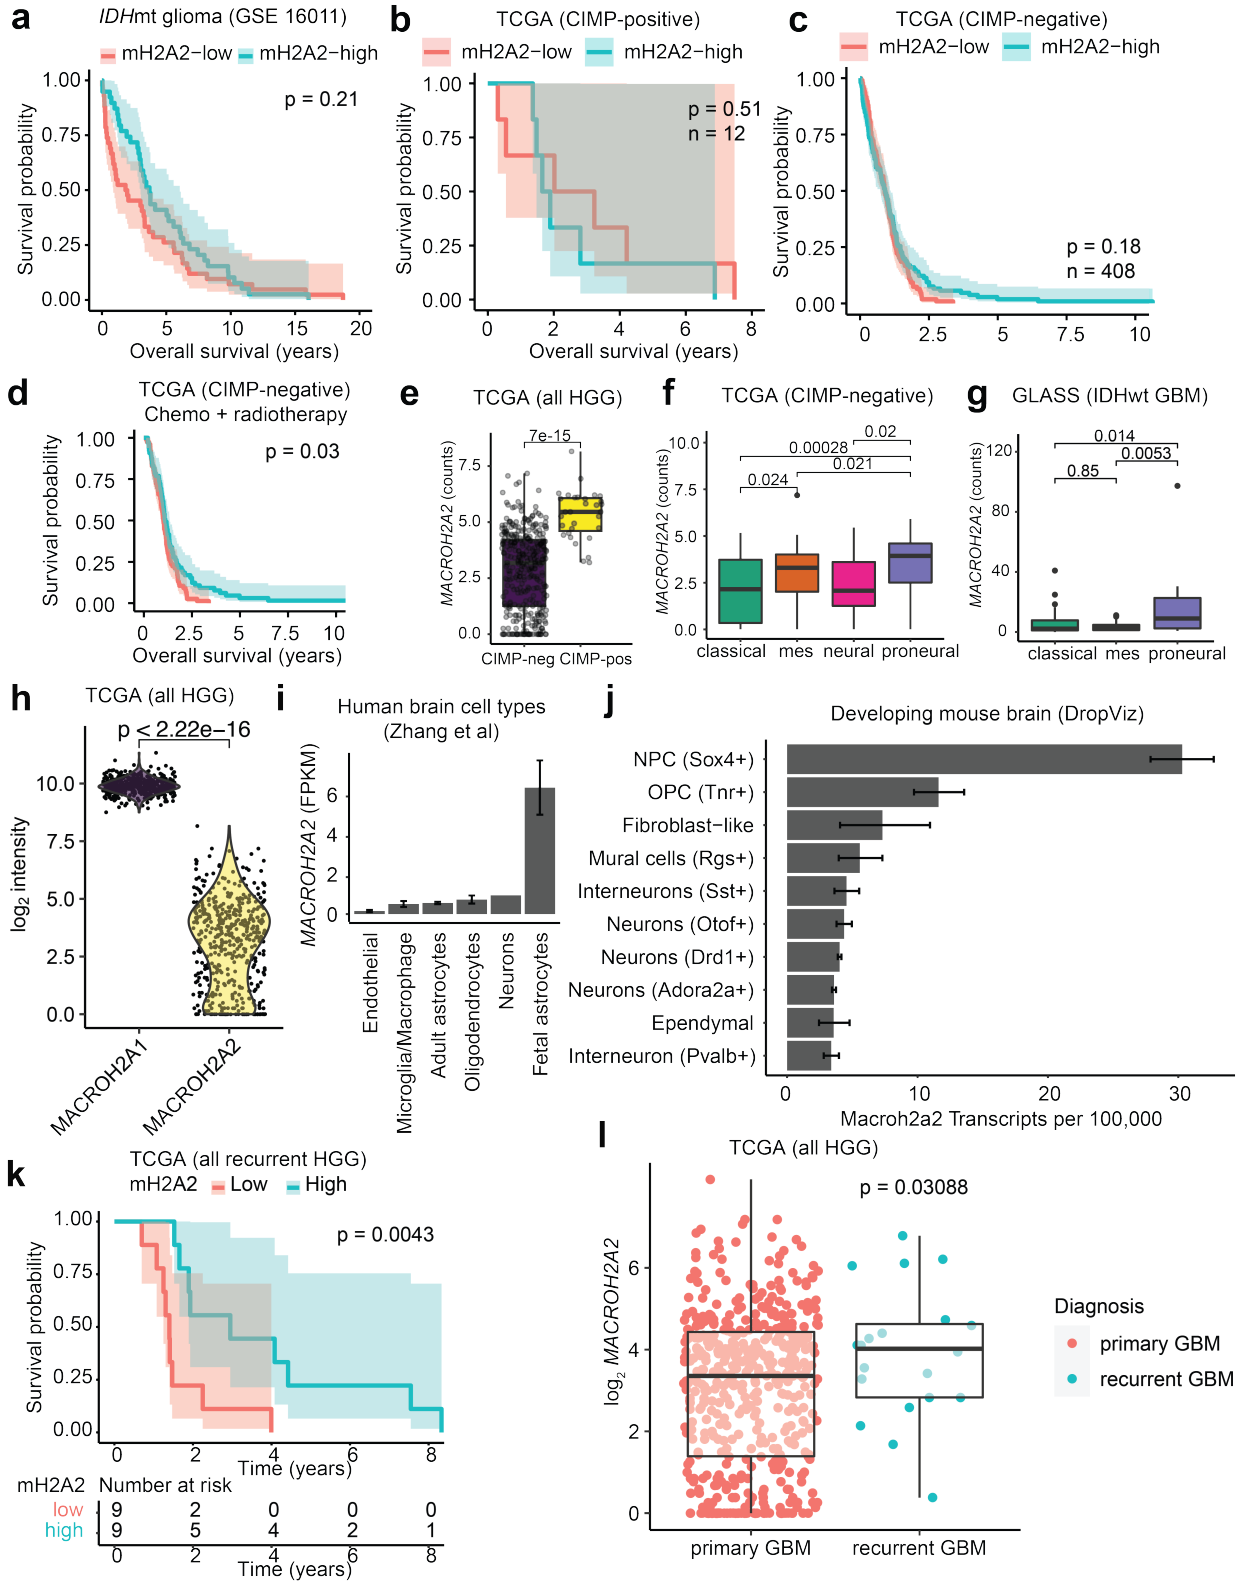

19  
 20  
 21

Supplementary Figure S3.



22 **(a)** Overall survival for *IDH* mutant gliomas in GSE 16011 stratified by median *MACROH2A2*  
23 (*mH2A2*). P value calculated by log-rank test. Shaded region represents 95% confidence  
24 interval.

25 **(b)** Overall survival for CIMP-positive mutant gliomas in the TCGA high-grade glioma cohort  
26 stratified by median *MACROH2A2* (*mH2A2*). P value calculated by log-rank test. Shaded region  
27 represents 95% confidence interval.

28 **(c)** Overall survival for CIMP-negative mutant gliomas in the TCGA high-grade glioma cohort  
29 stratified by median *MACROH2A2* (*mH2A2*). P value calculated by log-rank test. Shaded region  
30 represents 95% confidence interval.

31 **(d)** Overall survival for CIMP-negative mutant gliomas treated with chemotherapy and  
32 radiotherapy in the TCGA high-grade glioma cohort stratified by median *MACROH2A2*  
33 (*mH2A2*). P value calculated by log-rank test. Shaded region represents 95% confidence  
34 interval.

35 **(e)** *MACROH2A2* levels in CIMP-negative and CIMP-positive tumours in the TCGA high-grade  
36 glioma cohort. P value by two-tailed unpaired T test with Welch's correction. Boxplot line  
37 represents median, hinges at 25<sup>th</sup> and 75<sup>th</sup> percentiles, and whiskers at 1.5 x IQR.

38 **(f)** *MACROH2A2* expression in CIMP-negative tumours in TCGA high-grade glioma cohort  
39 separated by Verhaak transcriptional subtype. P value by two-tailed unpaired T test with Welch's  
40 correction.. Boxplot line represents median, hinges at 25<sup>th</sup> and 75<sup>th</sup> percentiles, and whiskers at  
41 1.5 x IQR.

42 **(g)** *MACROH2A2* expression in GLASS consortium primary *IDH*-wildtype GBM separated by  
43 Verhaak transcriptional subtype. P value by two-tailed unpaired T test with Welch's correction.  
44 Boxplot line represents median, hinges at 25<sup>th</sup> and 75<sup>th</sup> percentiles, and whiskers at 1.5 x IQR.

45 **(h)** Expression data for *MACROH2A1* and *MACROH2A2* in the TCGA high-grade glioma cohort  
46 (CIMP-positive and CIMP-negative). P value by two-tailed unpaired T test with Welch's  
47 correction.

48 **(i)** Expression of *MACROH2A2* in immunopanned human brain cell types.<sup>4</sup> Error bars represent  
49 standard error.

50 **(j)** Expression of *Macroh2a2* in different cell types in the mouse brain<sup>5</sup>. Error bars represent  
51 upper and lower 95% confidence interval.

52 **(k)** Kaplan-Meier survival status for patients with recurrent high-grade glioma in TCGA cohort –  
53 CIMP-positive and CIMP-negative (shaded region represents 95% confidence interval; p value  
54 calculated by log-rank test).

55 **(l)** Comparison of expression levels for *MACROH2A2* in TCGA data (CIMP-positive and CIMP-  
56 negative) for untreated versus treated primary glioblastoma (p value: two-tailed T test with  
57 Welch's correction; whiskers represent 95% confidence interval). Boxplot line represents  
58 median, hinges at 25<sup>th</sup> and 75<sup>th</sup> percentiles, and whiskers at 1.5 x IQR.  
59

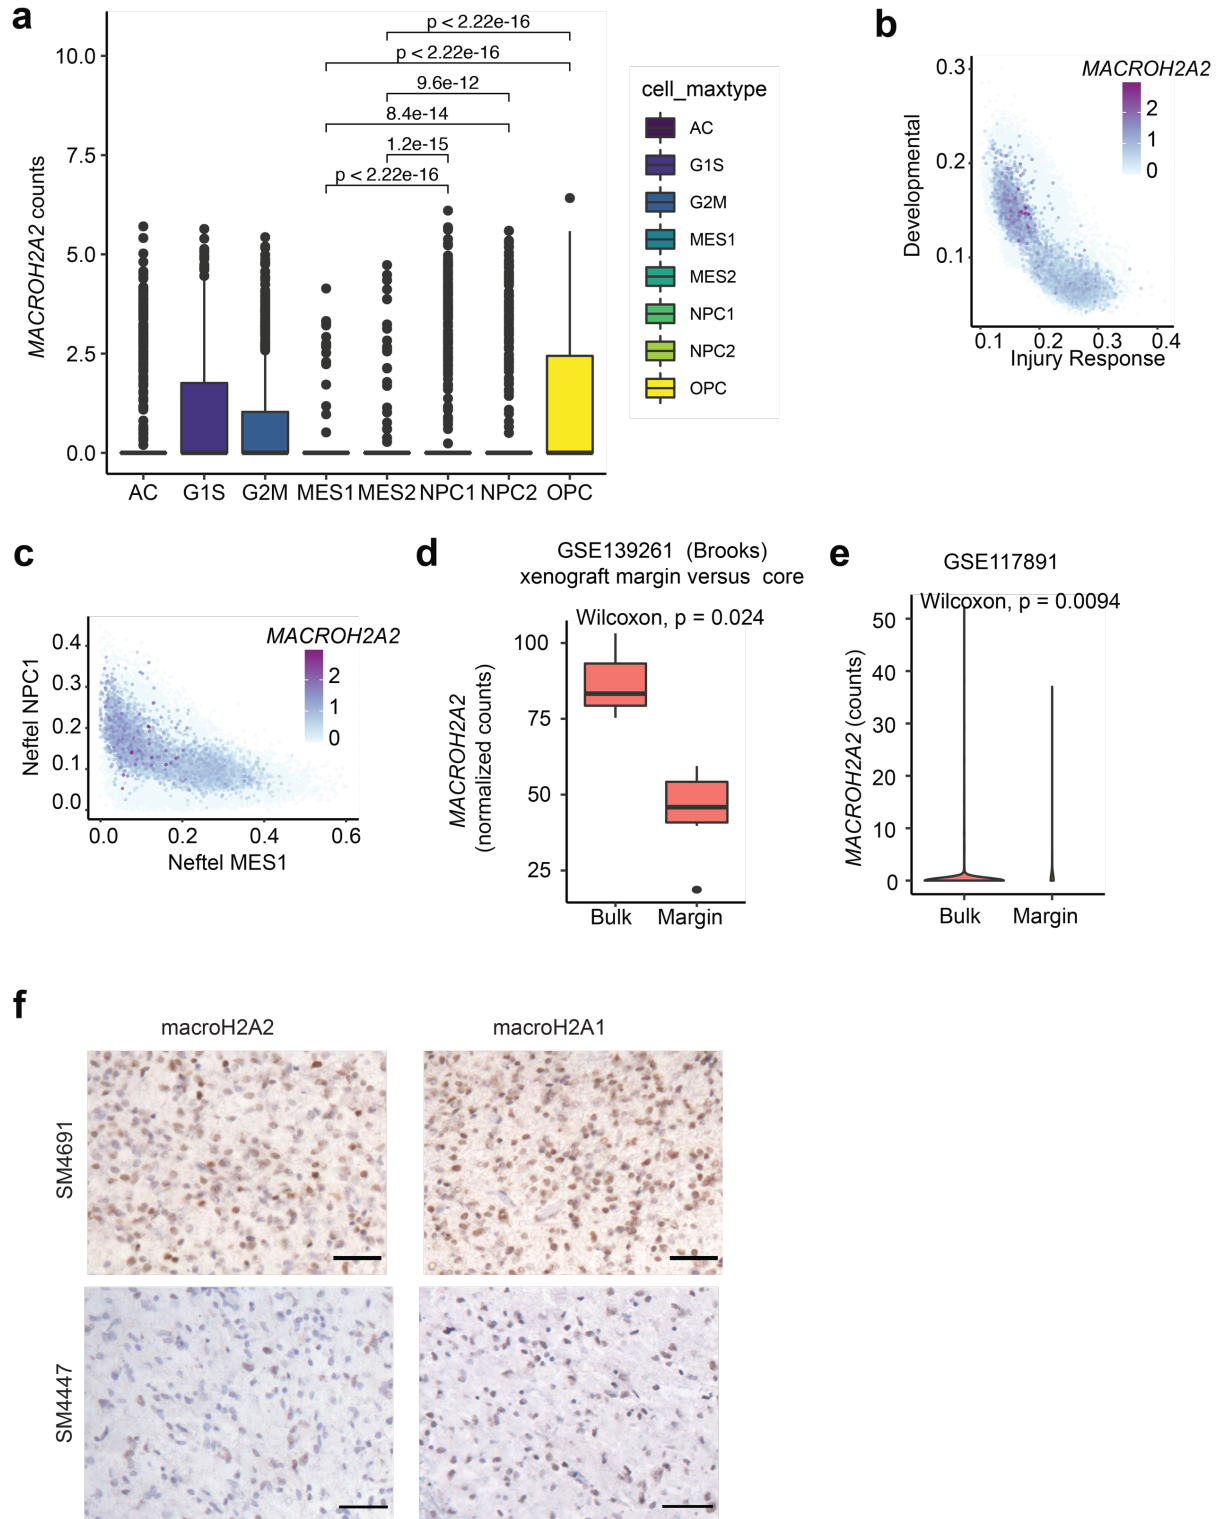

60  
 61 **Supplementary Figure S4. (a)** *MACROH2A2* counts in different cell subsets in the Neftel et al<sup>6</sup>  
 62 dataset (P values; unpaired two-tailed T-test with Welch's correction). Boxplot line represents  
 63 median, hinges at 25<sup>th</sup> and 75<sup>th</sup> percentiles, and whiskers at 1.5 x IQR. **(b-c)** *MACROH2A2*  
 64 counts in Richards et al<sup>7</sup> dataset plotted against **(b)** developmental and injury response axes and  
 65 **(c)** Neftel NPC1 and MES1 axes **(c)**. Comparison of *MACROH2A2* expression levels at tumour

66 bulk versus margin regions in **(d)** Brooks et al xenografts<sup>8</sup> (GSE139261) [Boxplot line represents  
67 median, hinges at 25<sup>th</sup> and 75<sup>th</sup> percentiles, and whiskers at 1.5 x IQR; P value by Wilcoxon test]  
68 and **(e)** individual tumour cells from Yu et al<sup>9</sup> regionalized scRNA-seq data from gliomas  
69 (GSE117891; P value: Wilcoxon test). **(f)** Immunohistochemistry of macroH2A2 and  
70 macroH2A1 in two patient tumours (scale bar 50 microns).  
71

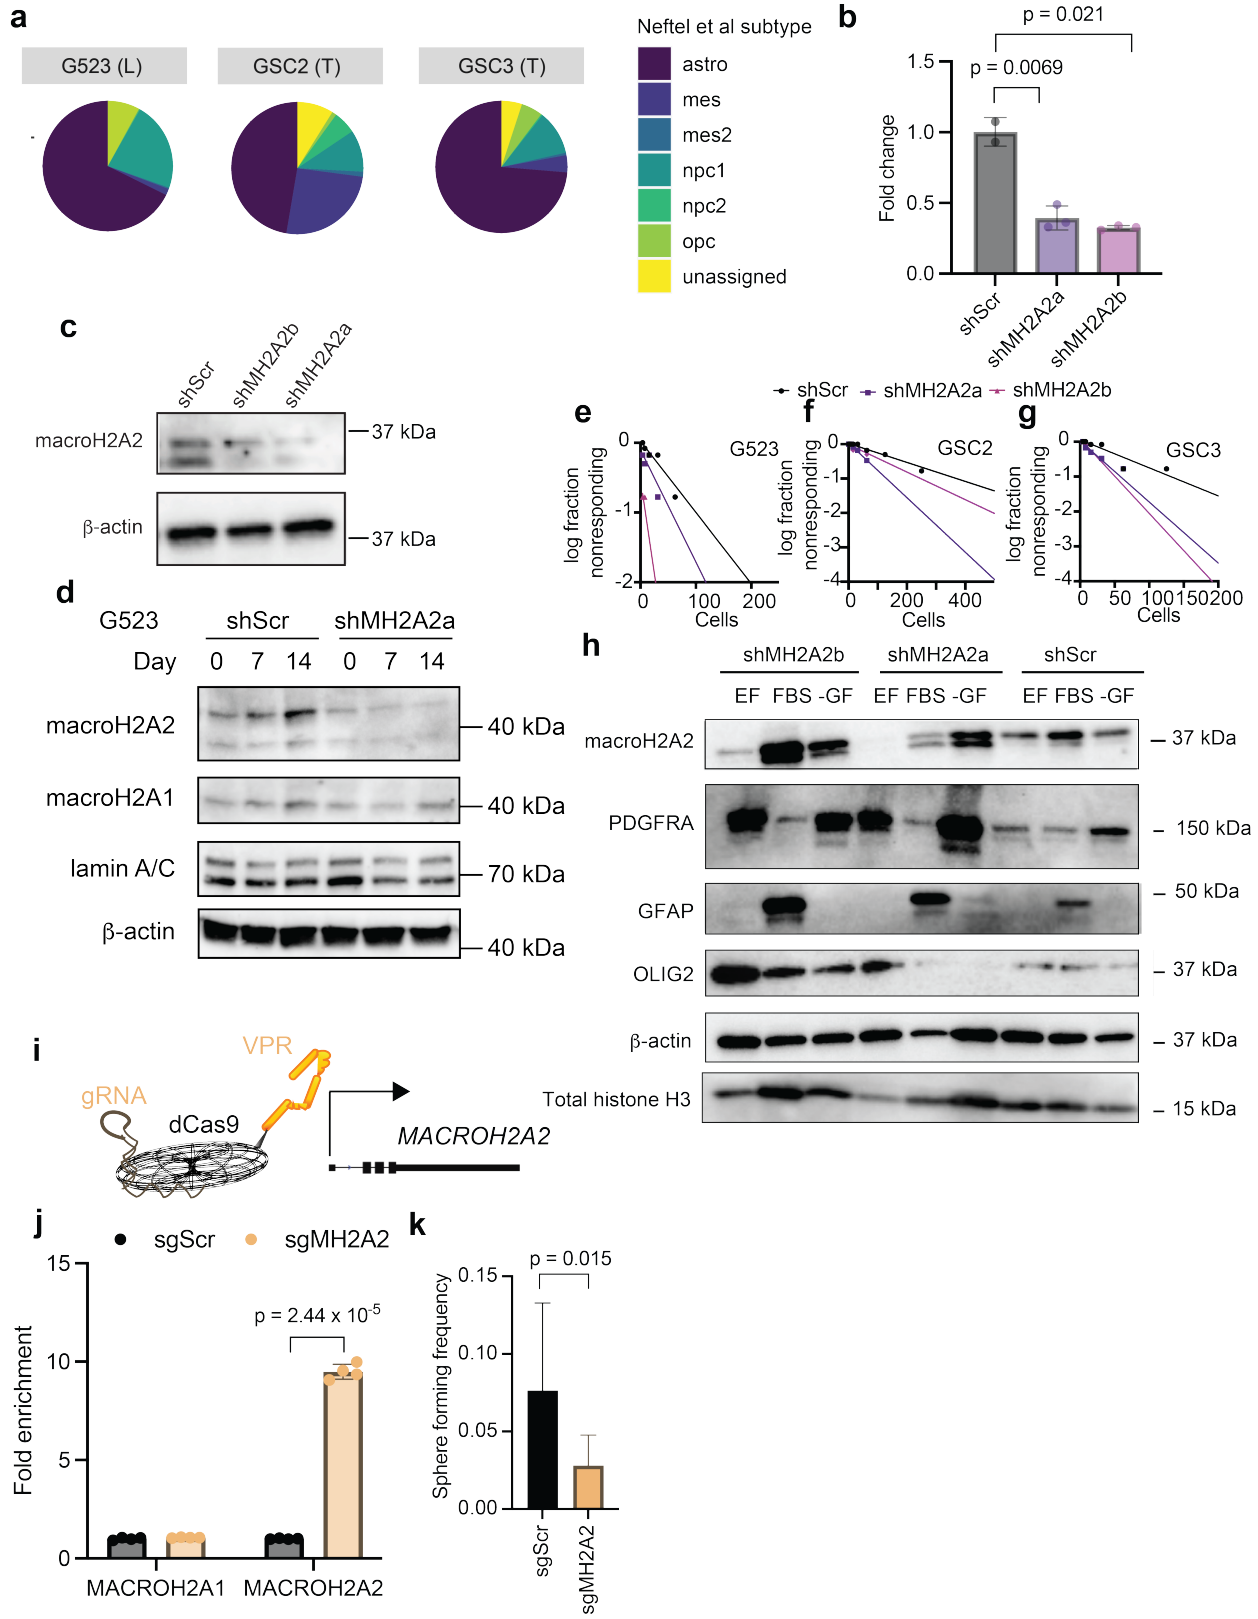

75 **Supplementary Figure S5. (a)** Characterization of cell subtypes in primary tumours based on  
76 published scRNA-seq (G523)<sup>7</sup> and scATAC-seq datasets. **(b)** RT-qPCR validation of  
77 *MACROH2A2* transcript levels at 48 hours post-induction (center represents overall per-  
78 condition mean; 3 biological replicates/condition; error bars represent standard error; p value by  
79 unpaired two-tailed T-test). **(c)** macroH2A2 protein levels after two weeks of induction in two  
80 hairpins. Experiment repeated three times. **(d)** Western blot of macroH2A2 and macroH2A1  
81 after 7 or 14 days of activation with doxycycline. Experiment repeated two times.  
82 **(e-g)** Log fraction non-responding plots for limiting dilution assays on **(e)** G523, **(f)** GSC2 and  
83 **(g)** GSC3 cells.  
84 **(h)** Western blot showing differentiation marker expression in G523 cells after 7 days of  
85 *MACROH2A2* knockdown and 7 days of culture under stem (EF) or differentiation conditions  
86 [FBS – 1% FBS; -GF – growth factor withdrawal (no EGF or FGF)]. Experiment performed  
87 twice.  
88 **(i)** Schematic of dCas9-based overexpression model.  
89 **(j)** RT-qPCR validation of transcript levels of *MACROH2A1* and *MACROH2A2* after  
90 transfection with sgRNAs (center: overall per-condition mean; 3 biological replicates/condition;  
91 error bars represent standard error; p value by unpaired two-tailed T-test).  
92 **(k)** Sphere forming frequency of sgMH2A2 versus Scramble sgRNA treated cells. P value was  
93 determined by Chi-square test with the tool ELDA (see Methods). Center: point estimate of  
94 sphere formation potential. Error bars: 95% confidence interval. Statistics from 6 technical  
95 replicates.  
96  
97  
98  
99  
100

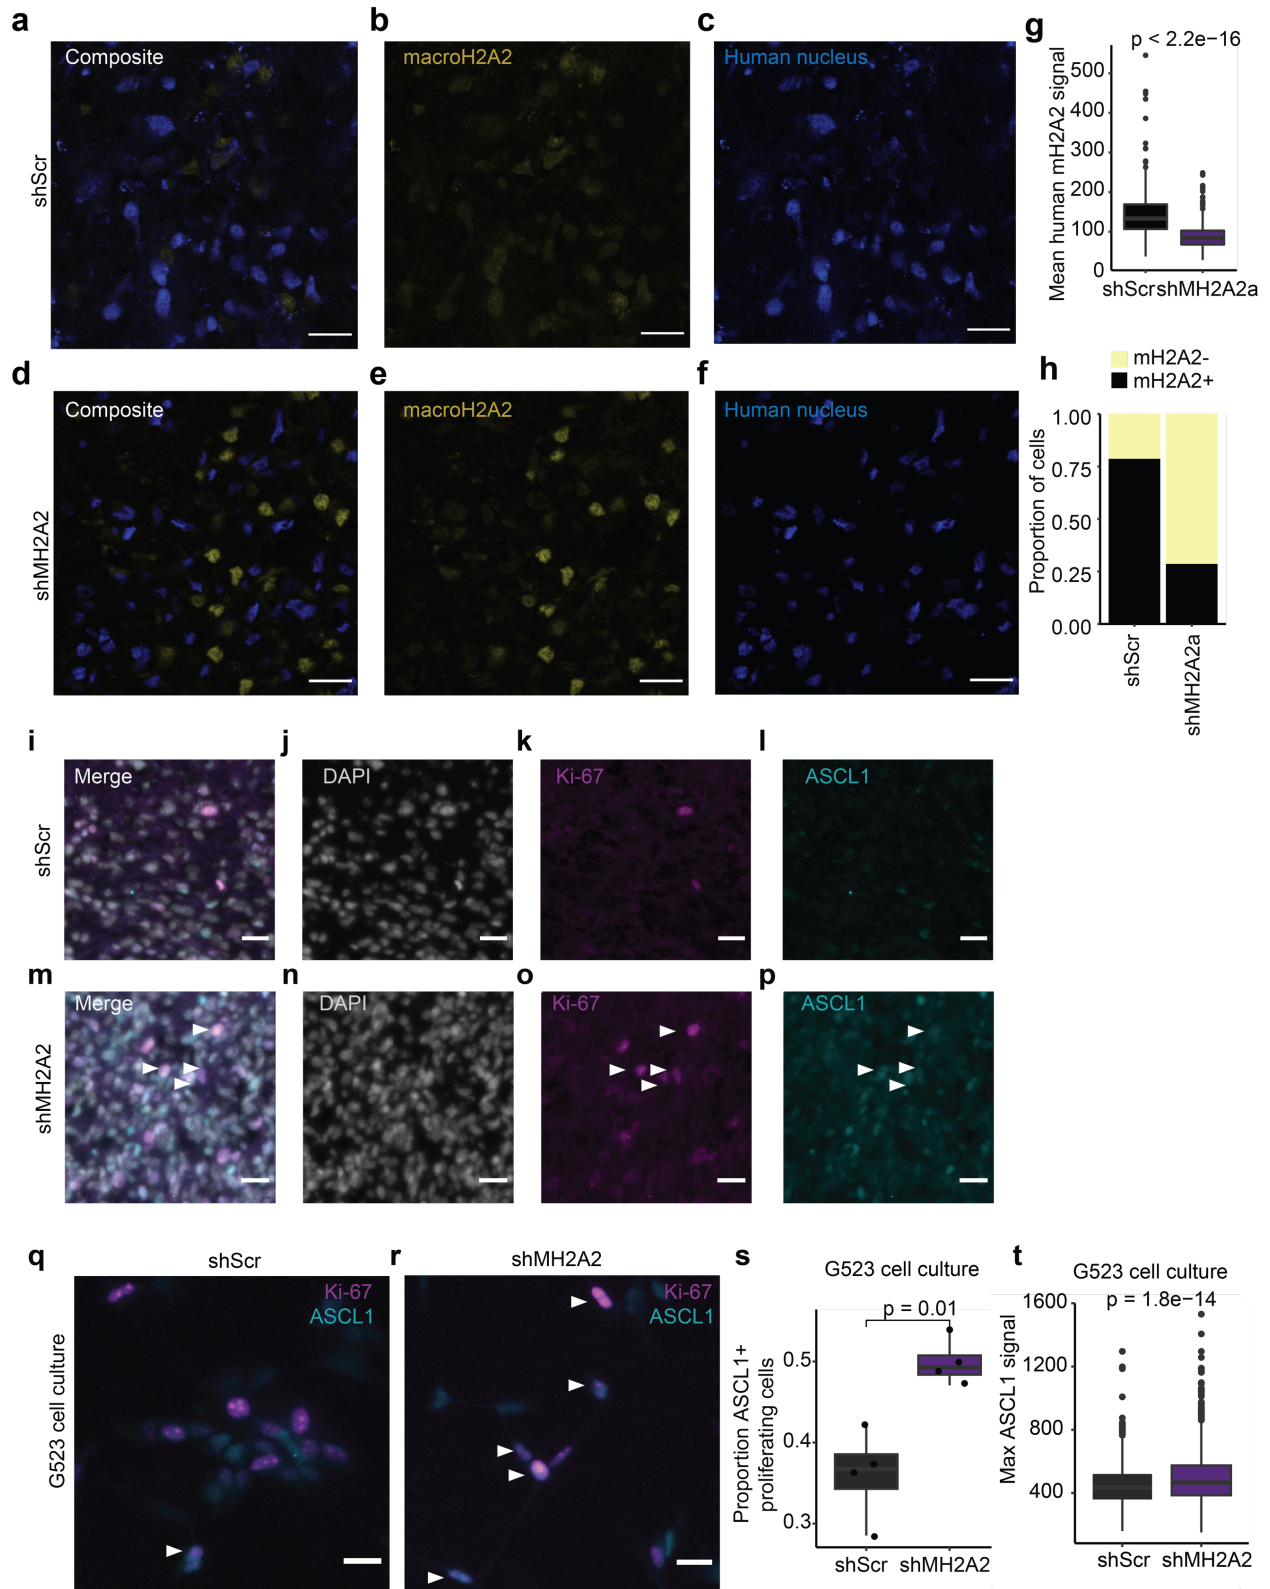

101  
102  
103  
104

**Supplementary Figure S6.**

**(a-f)** Representative confocal microscopy images of macroH2A2 and human nucleus stained cells in shScr control xenografts **(a-c)** and knockdown xenografts **(d-f)** [scale bar: 20 microns].

105 **(g-h)** Quantification of human macroH2A2 signal **(g)** and proportion of positive cells **(h)** by  
106 confocal microscopy over a 20x field in scramble and knockdown cells (p values: unpaired two-  
107 tailed T-test); repeated over two fields. Boxplot line represents median, hinges at 25<sup>th</sup> and 75<sup>th</sup>  
108 percentiles, and whiskers at 1.5 x IQR. **(i-p)** Representative widefield microscopy images of Ki-  
109 67 and ASCL1 colabeling in control **(i-l)** and knockdown **(m-p)** xenograft mice. Scale bar: 25  
110 microns. Experiment repeated in at least 2 mice per condition. **(q-r)** Immunocytochemistry for  
111 Ki-67 and ASCL1 in G523 control **(q)** or shMH2A2 **(r)** cells after 1 week of induction.  
112 Experiment repeated on two biological replicates. Scale bar: 25 microns. **(s)** Comparison of  
113 ASCL1+ proliferating cells between control and knockdown conditions. P value: unpaired two-  
114 tailed T test with Welch's correction. Boxplot line represents median, hinges at 25<sup>th</sup> and 75<sup>th</sup>  
115 percentiles, and whiskers at 1.5 x IQR. **(t)** Maximum ASCL1 signal intensity per cell in control  
116 versus shMH2A2 cells. P value: unpaired two-tailed T-test with Welch's correction. Boxplot line  
117 represents median, hinges at 25<sup>th</sup> and 75<sup>th</sup> percentiles, and whiskers at 1.5 x IQR.  
118

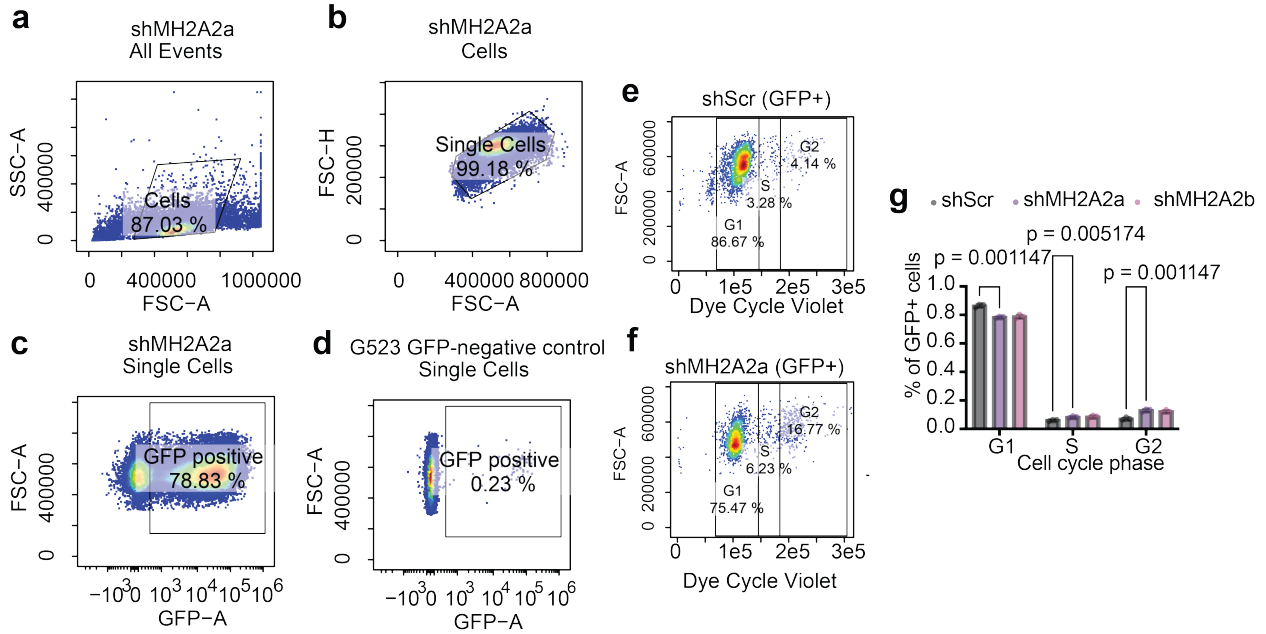

119  
120  
121  
122  
123  
124  
125  
126  
127  
128

**Supplementary Figure S7**

(a-d) Flow cytometry analysis showing gating strategy for flow cytometry experiments of CD44 and cell cycle analysis on knockdown cells induced for 7 days. (c-d) Example of GFP positivity in knockdown cells induced for 7 days (c) versus uninduced control (d) (e-g) Cell cycle analysis of G523 cells by Dye Cycle Violet: representative traces of control and knockdown cells (e-f) and quantification (g) of biological replicates (n = 3). P values: unpaired two-tailed T-test with Welch's correction. Error bars represent standard deviation.



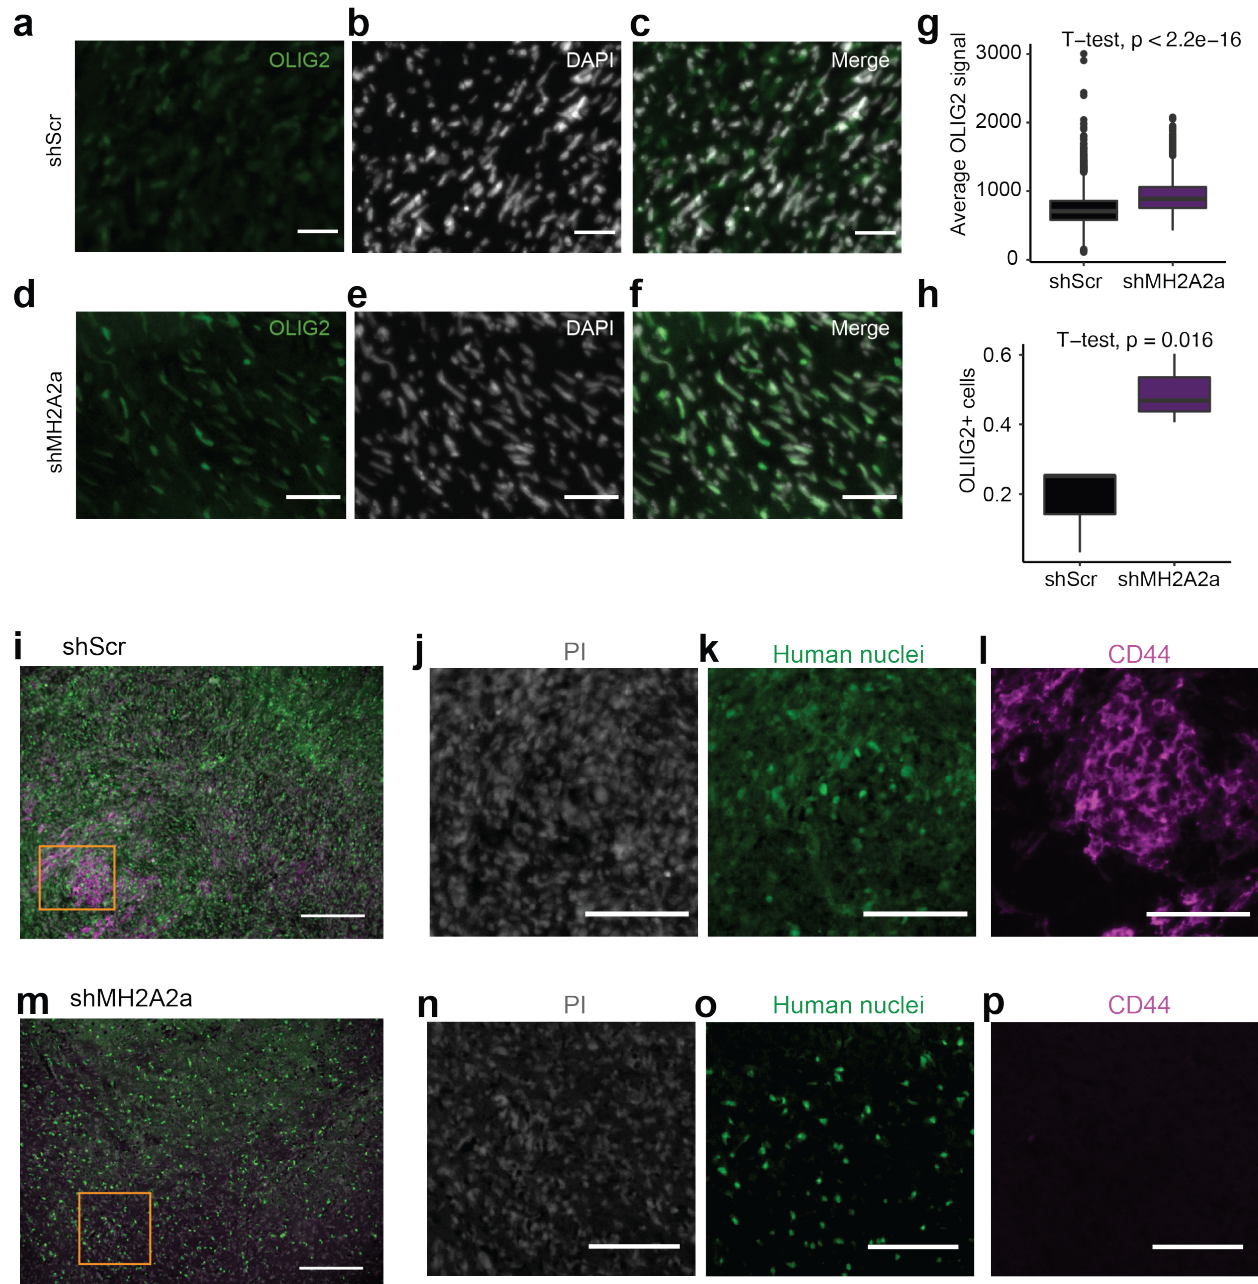

129  
130  
131  
132  
133  
134  
135  
136  
137  
138  
139  
140

**Supplementary Figure S8.**

(a-f) Representative images of shScr (a-c) and shMH2A2a (d-f) xenografts stained for OLIG2. (g) Quantification of average OLIG2 signal (p value calculated by unpaired two-tailed T-test). Boxplot line represents median, hinges at 25<sup>th</sup> and 75<sup>th</sup> percentiles, and whiskers at 1.5 x IQR. (h) Proportion of OLIG2-positive cells in control versus knockdown tumours (p value calculated by unpaired two-tailed T-test). Quantification performed over 3 10x fields. Scale bar: 50 microns. Boxplot line represents median, hinges at 25<sup>th</sup> and 75<sup>th</sup> percentiles, and whiskers at 1.5 x IQR. (i-l) Fluorescence immunohistochemistry of control xenografts stained for human nuclear antigen, propidium iodide, and CD44. (i) represents composite image (scale bar 200 mm), and (j)-(l) represent magnified single channel images of the inset area in orange (scale bar 100 mm).

141 **(m-p)** Fluorescence immunohistochemistry of shMH2A2a xenografts stained for human nuclear  
142 antigen, propidium iodide, and CD44. **(m)** represents composite image (scale bar 200 mm), and  
143 **(n)-(p)** represent magnified single channel images of the inset area in orange (scale bar 100 mm).  
144 Experiments in **(i)-(p)** repeated twice on three independent animals.  
145

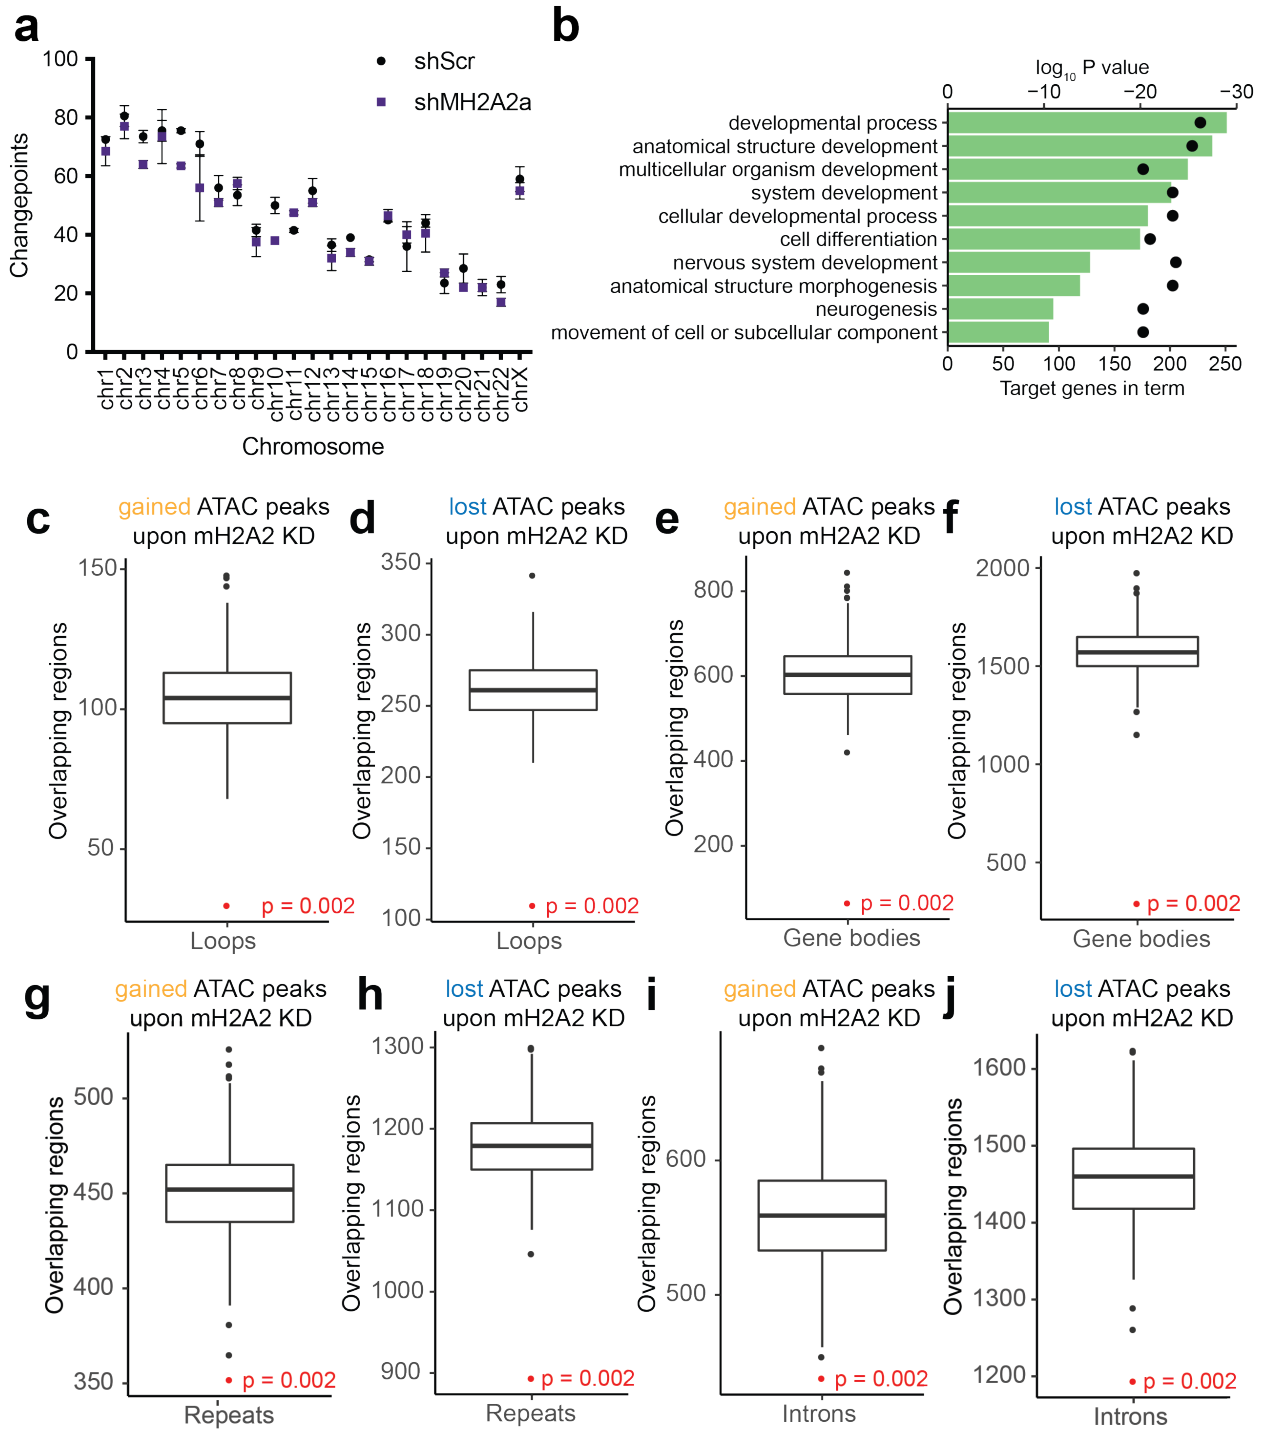

147

148

**Supplementary Figure S9.**

149 (a) Changepoint analysis of knockdown (shMH2A2a) versus control cells. Error bars represent  
150 standard deviation.

151 (b) GO process terms enriched in peaks lost upon macroH2A2 knockdown. P value:

152 hypergeometric test.

153 **(c-j)** Permutation analysis of regions with at least 1.5 fold  $\log_2$  change in accessibility upon  
154 *MACROH2A2* knockdown with **(c-d)** DNA loop boundaries (Johnston et al 2019); **(e-f)** Gene  
155 bodies; **(g-h)** repeat regions from the RepeatMasker database; **(i-j)** Introns. Regions of  
156 accessibility gain and loss were analysed separately. P value by hypergeometric test from 500  
157 permutations. Boxplot line represents median, hinges at 25<sup>th</sup> and 75<sup>th</sup> percentiles, and whiskers at  
158 1.5 x IQR.  
159

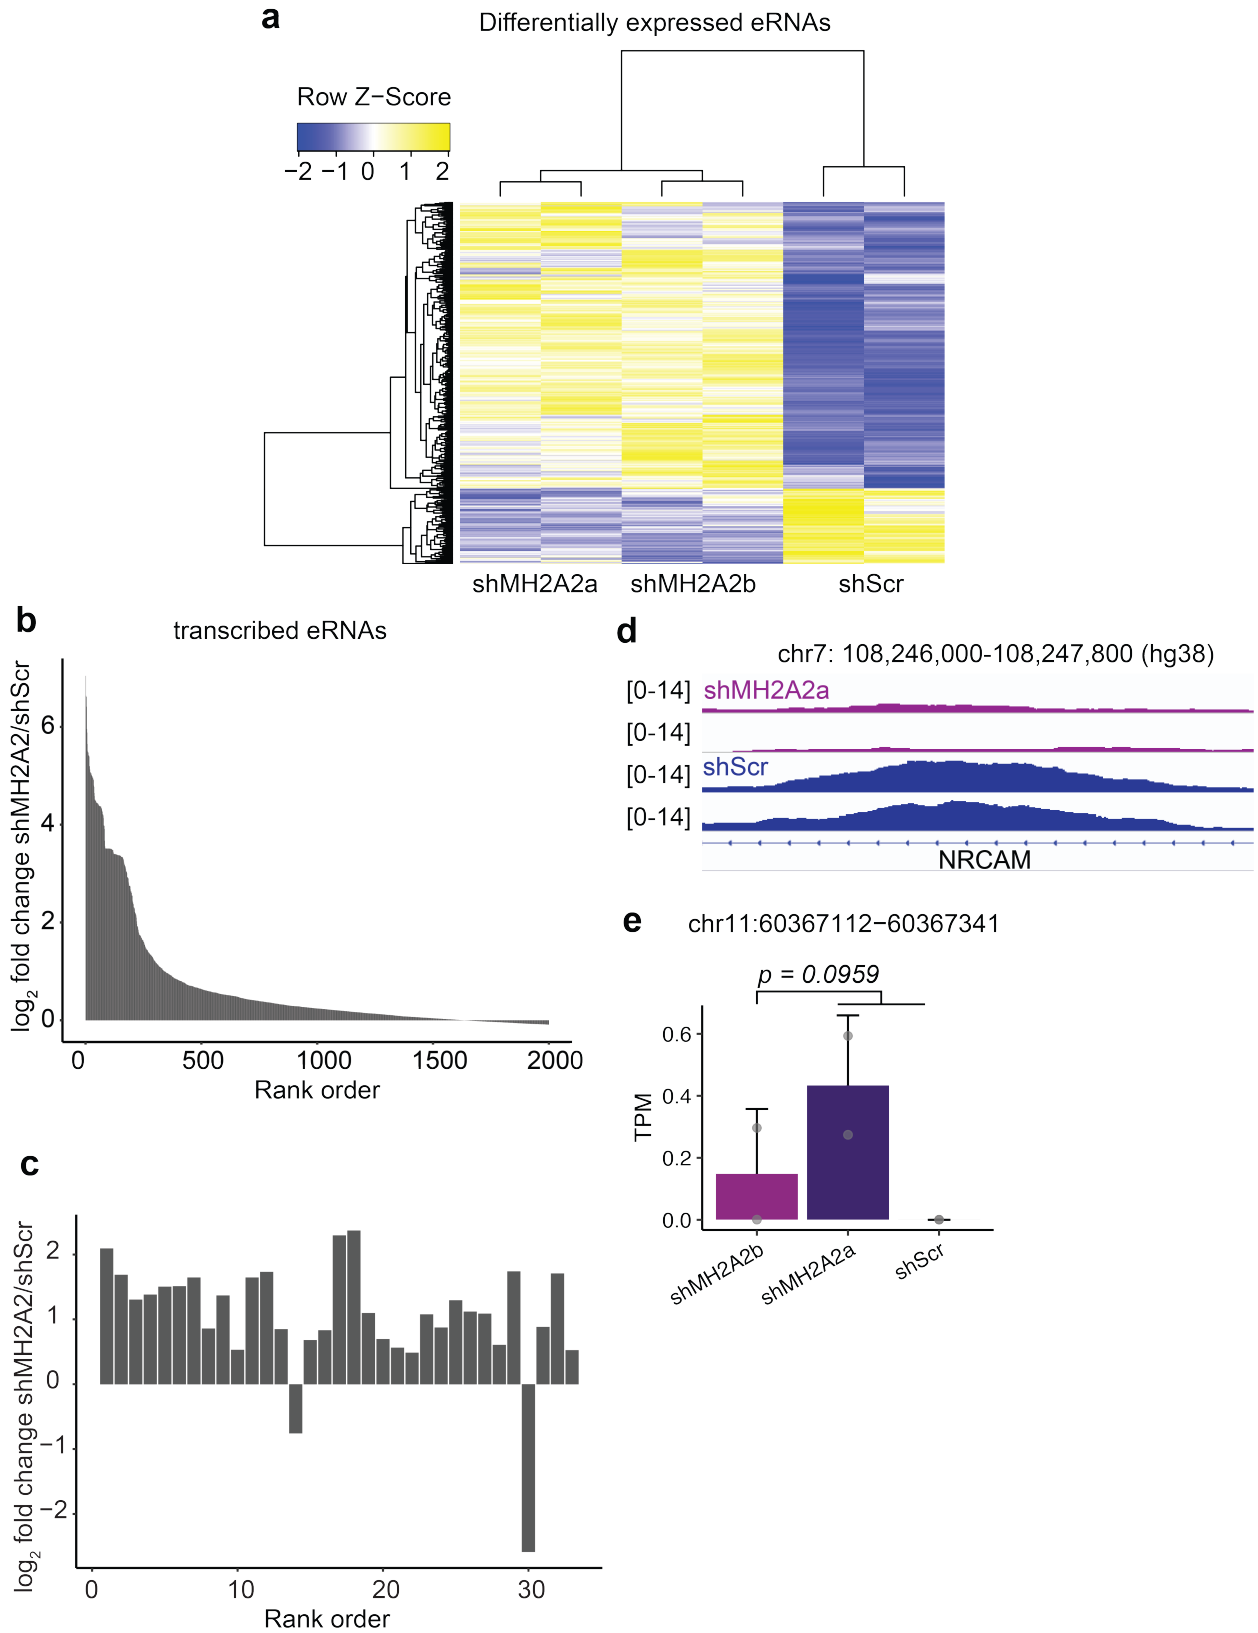

160  
161

**Supplementary Figure S10.**

- 162 **(a)** Differential expression of top 200 differentially expressed GBM-specific putative eRNAs  
163 between *MACROH2A2* knockdown and control cells.
- 164 **(b)** Top 2000 differentially transcribed GBM-specific eRNAs between macroH2A2 knockdown  
165 and control cells, ranked by fold change.
- 166 **(c)** Close up of significantly differentially transcribed eRNA, ranked by p value.
- 167 **(d)** Example of a representative ATAC-seq enhancer peak lost upon macroH2A2 knockdown.
- 168 **(e)** Example of eRNA at an enhancer locus with increased accessibility. P value calculated by  
169 unpaired T test. Center: mean TPM per condition. Error bars represent standard deviation.

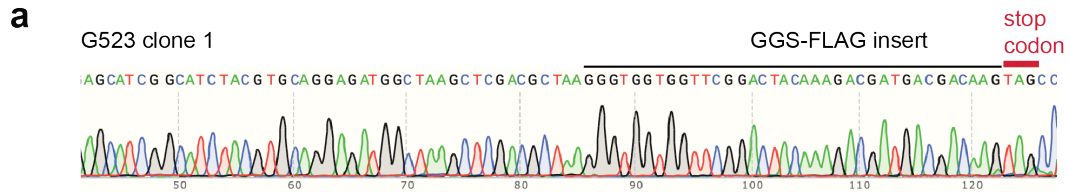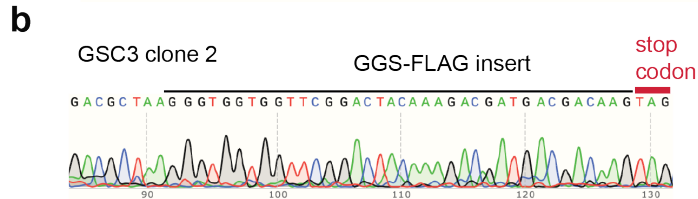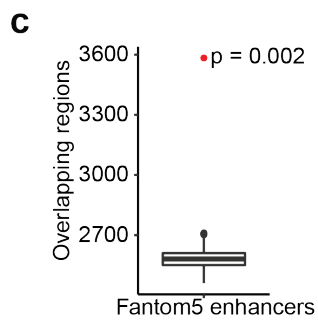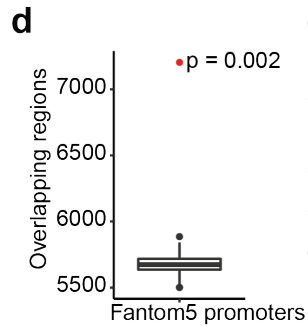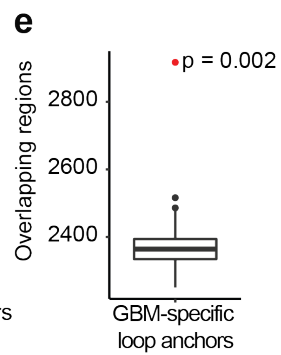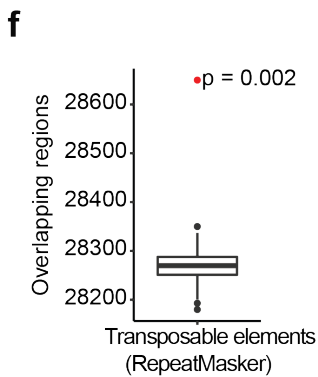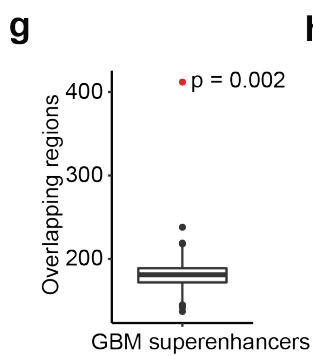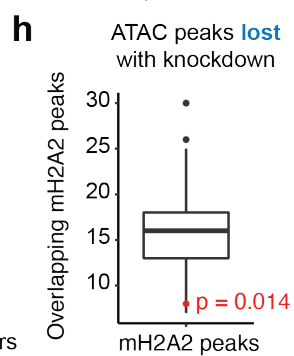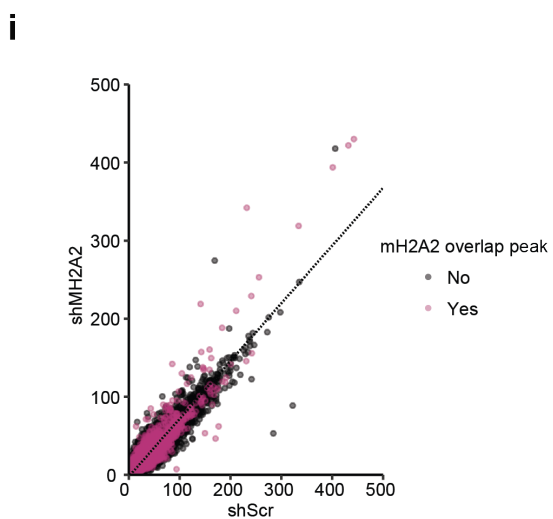

171 **Supplementary Figure S11.**  
172 **(a-b)** Sanger sequencing traces confirming in-frame FLAG insert in G523 **(a)** and GSC3 **(b)**  
173 clones. **(c-g)** Permutation analysis of macroH2A2 ChIP peaks with Fantom5 enhancers **(c)**,  
174 promoters **(d)**, GBM-specific loop anchors **(e)**, transposable elements **(f)**, and GBM  
175 superenhancers **(g)**. **(h)** Permutation analysis of ATAC-seq peaks lost in shMH2A2a knockdown  
176 cells compared to macroH2A2 peaks. All P values by hypergeometric test, n = 500 permutations.  
177 Boxplot line represents median, hinges at 25<sup>th</sup> and 75<sup>th</sup> percentiles, and whiskers at 1.5 x IQR. **(i)**  
178 Scatterplot of ATAC peaks between control and knockdown cells colored by macroH2A2  
179 overlap status.  
180  
181



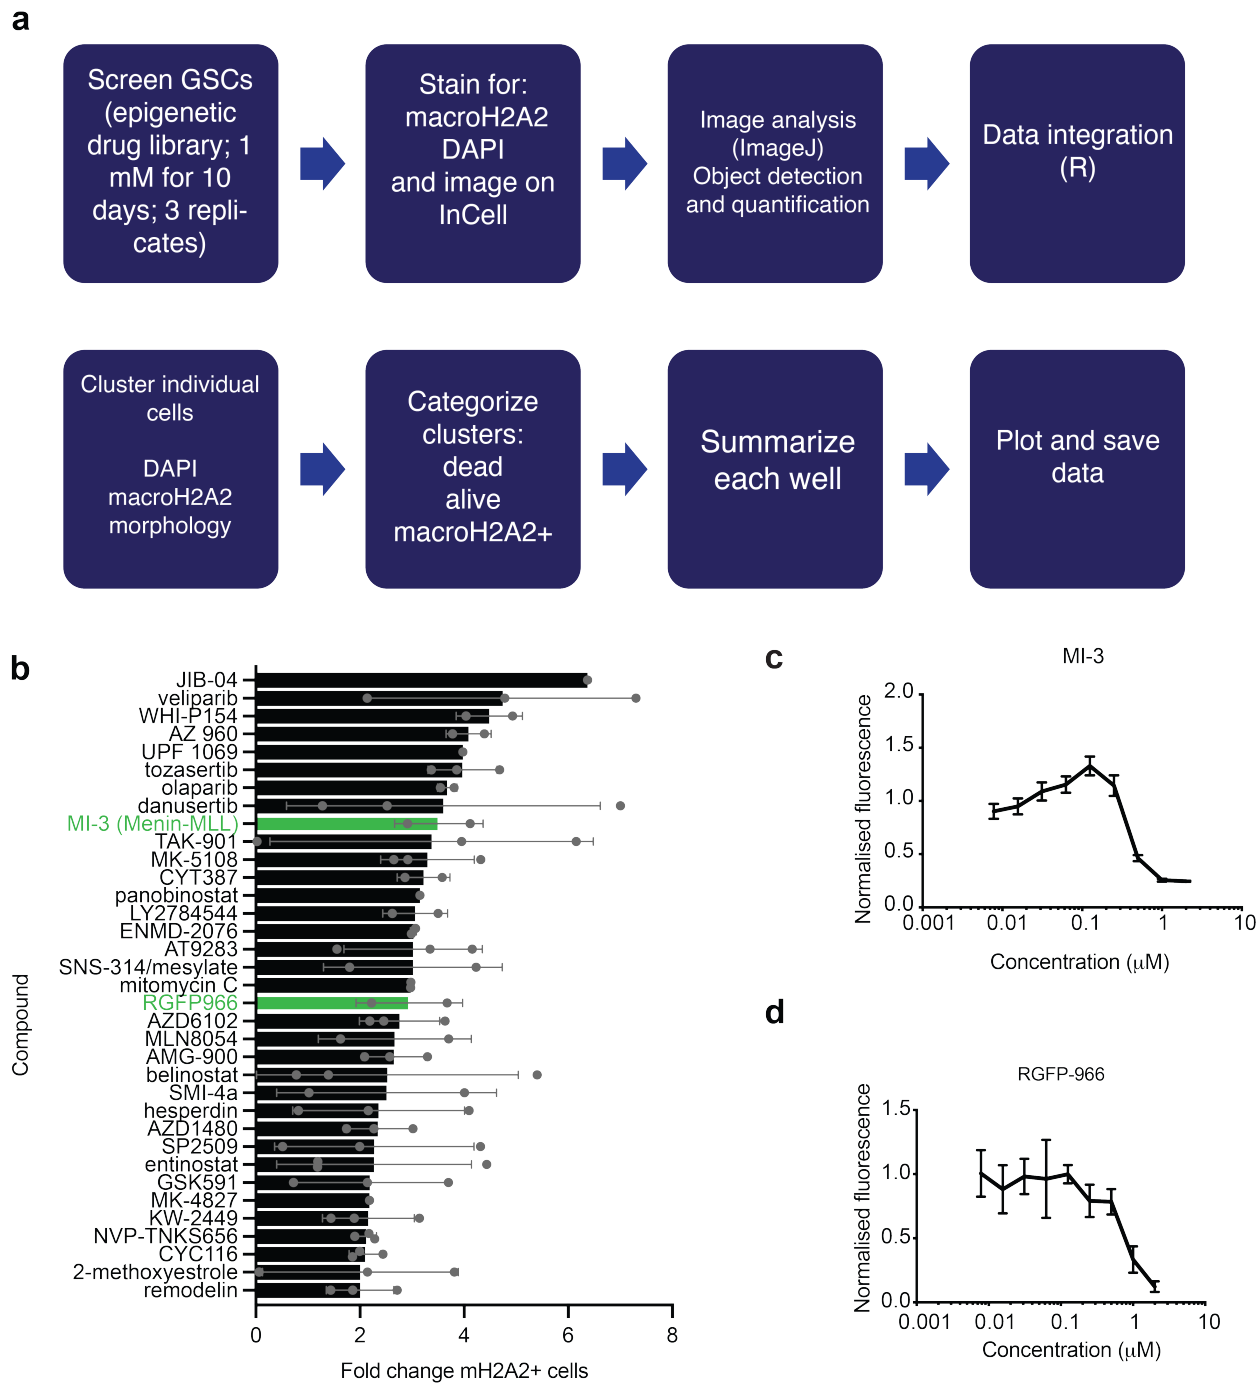

**Supplementary Figure S12.**

**(a)** Overview of high-content screening strategy.

**(b)** List of compounds showing more than 2-fold increase in macroH2A2 levels. Error bars represent standard deviations.

**(c)** Alamar blue *in vitro* dose-response curve for MI-3 in G523 cells. Six technical replicates per concentration. Error bars represent standard deviation. Experiment repeated two times.

191 **(d)** Alamar blue *in vitro* dose-response curve for RGFP-966 in G523 cells. Six technical  
192 replicates per concentration. Error bars represent standard deviation, and center represents mean  
193 signal at each concentration. Experiment repeated two times.

194

195

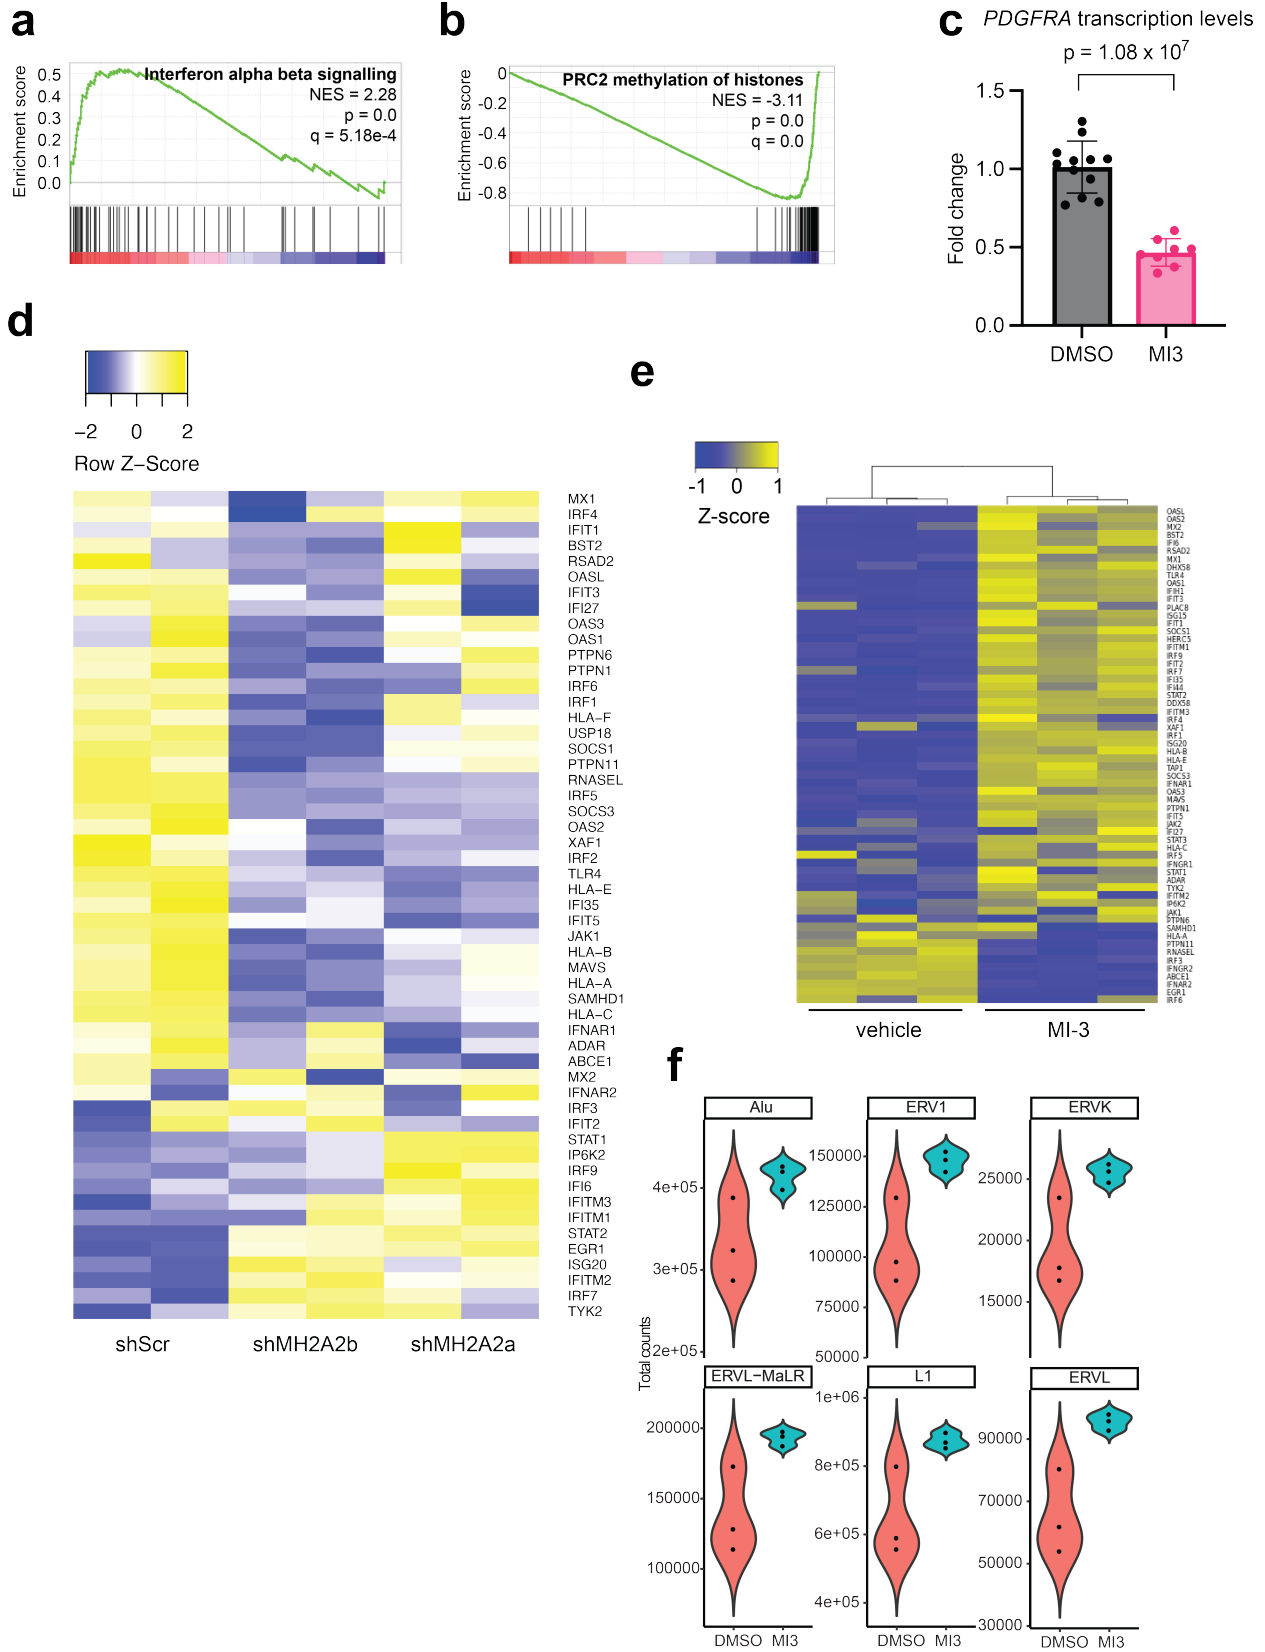

196  
197

Supplementary Figure S13.

198 **(a-b)** GSEA results showing altered interferon signalling and methylation signatures upon MI-3  
199 treatment compared to DMSO control. P value by hypergeometric test, q value by  
200 hypergeometric test with Benjamini-Hochberg correction.  
201 **(c)** Change in *PDGFRA* transcription by qPCR upon MI-3 treatment. Three biological and three  
202 technical replicates per condition. Center represents mean fold change across all replicates. P  
203 value from unpaired two-tailed T-test. Error bars represent standard deviation. **(d)** Expression of  
204 ISGs in control versus macroH2A2 knockdown cells. **(e)** Expression of ISGs in MI3 and DMSO  
205 treated cells. **(f)** Expression of select repeat elements in DMSO versus MI-3 treated cells.  
206  
207  
208

209 References:

- 210 1. Gravendeel, L. A. M. *et al.* Intrinsic gene expression profiles of gliomas are a better predictor  
211 of survival than histology. *Cancer Research* **69**, 9065–9072 (2009).
- 212 2. Brennan, C. W. *et al.* The somatic genomic landscape of glioblastoma. *Cell* **155**, 462–77  
213 (2013).
- 214 3. Verhaak, R. G. W. *et al.* Integrated Genomic Analysis Identifies Clinically Relevant Subtypes  
215 of Glioblastoma Characterized by Abnormalities in PDGFRA, IDH1, EGFR, and NF1.  
216 *Cancer Cell* **17**, 98–110 (2010).
- 217 4. Zhang, Y. *et al.* Purification and Characterization of Progenitor and Mature Human Astrocytes  
218 Reveals Transcriptional and Functional Differences with Mouse. *Neuron* **89**, 37–53 (2016).
- 219 5. Saunders, A. *et al.* Molecular Diversity and Specializations among the Cells of the Adult  
220 Mouse Brain. *Cell* **174**, 1015–1030 (2018).
- 221 6. Neftel, C. *et al.* An Integrative Model of Cellular States, Plasticity, and Genetics for  
222 Glioblastoma. *Cell* **178**, 835-849.e21 (2019).
- 223 7. Richards, L. M. *et al.* Gradient of Developmental and Injury Response transcriptional states  
224 defines functional vulnerabilities underpinning glioblastoma heterogeneity. *Nature Cancer* **2**,  
225 157–173 (2021).
- 226 8. Brooks, L. J. *et al.* The white matter is a pro-differentiative niche for glioblastoma. *Nature*  
227 *Communications* **12**, 2184 (2021).
- 228 9. Yu, K. *et al.* Surveying brain tumor heterogeneity by single-cell RNA-sequencing of multi-  
229 sector biopsies. *National Science Review* **7**, 1306–1318 (2020).

230
