# Supplementary material for: macroH2A2 antagonizes epigenetic programs of stemness in glioblastoma
Source: PubMed Central journal article supplement (PMC10224928; doi:10.1038/s41467-023-38919-2), 2023-05-27
Supplement: 41467_2023_38919_MOESM3_ESM.pdf [file 41467_2023_38919_MOESM3_ESM.pdf]

Title: Supplementary Data 1

Description: Summary of genomic analyses and primer sequences.
